# Supplementary material
Source: PubMed Central journal article supplement (PMC7571444)
Supplement: mmc1.pdf [file mmc1.pdf]

1 SUPPLEMENTARY MATERIAL

2 Characterization of long-range transported  
3 bioaerosols in the Central Mediterranean

4  
5 Chiara Petroselli,<sup>1</sup>, Elena Montalbani<sup>2</sup>, Gianandrea La Porta<sup>2</sup>, Stefano Crocchianti<sup>2</sup>, Beatrice  
6 Moroni<sup>2</sup>, Chiara Casagrande<sup>2</sup>, Elisa Ceci<sup>2</sup>, Roberta Selvaggi<sup>2</sup>, Bartolomeo Sebastiani<sup>2</sup>, Isabella  
7 Gandolfi<sup>3</sup>, Andrea Franzetti<sup>3</sup>, Ermanno Federici<sup>2</sup> and David Cappelletti<sup>2,4</sup>

8  
9  
10 FIGURE SM1 – DREAM8b results for MM site for selected example cases under study  
11 FIGURE SM2 – Vertical distribution of dust at the MM site  
12 FIGURE SM3 – BT analysis for 50 and 1000 m endpoints.  
13 FIGURE SM4 - PCA analysis on chemical variables  
14 FIGURE SM5 - Boxplot distributions of relative abundance of bacterial genera for the various air  
15 mass origins.  
16

17 **Figure SM1 – DREAM8b results for MM site for selected example cases under study**

18 Dust low level concentration (left panel) and meteofields (right panel) for the Mediterranean area  
19 (DREAM8b model) for selected example cases under study in the present work.

20 A) 30 Nov 2014, Intense Saharan (SH) advection.

21

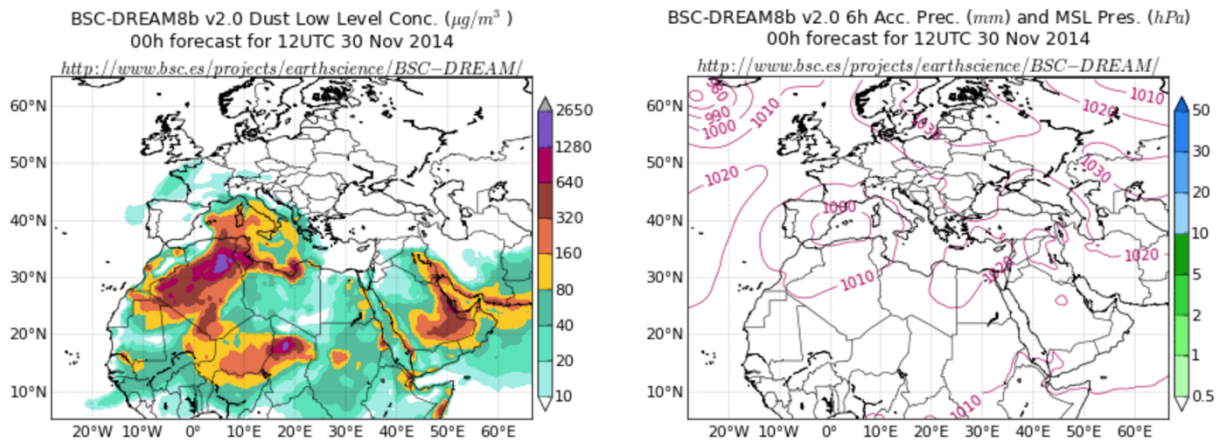

22

23 B) 01 Jun 2015, Regional (REG) air mass with a partial influence of Western sectors

24

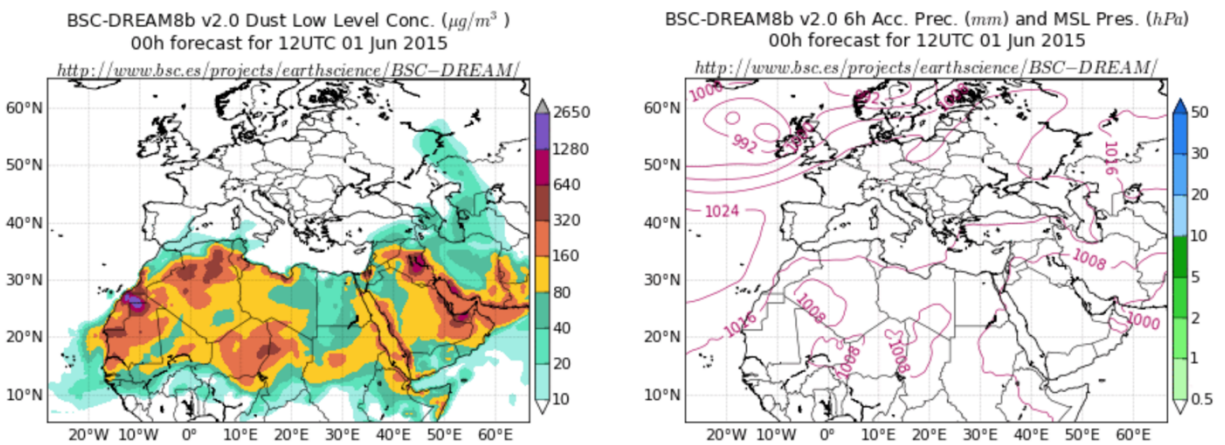

25

26

27

28

29

30

31

32

33 C) 10 Mar 2014, Northeastern (NE) air mass  
34  
35

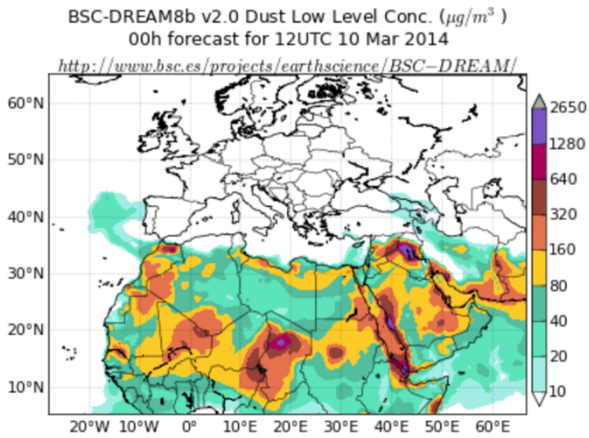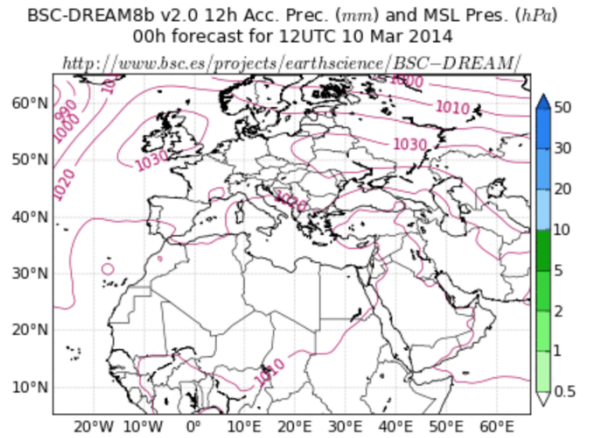

36  
37  
38 D) 22 Oct 2014, Northwestern (NW) air mass  
39

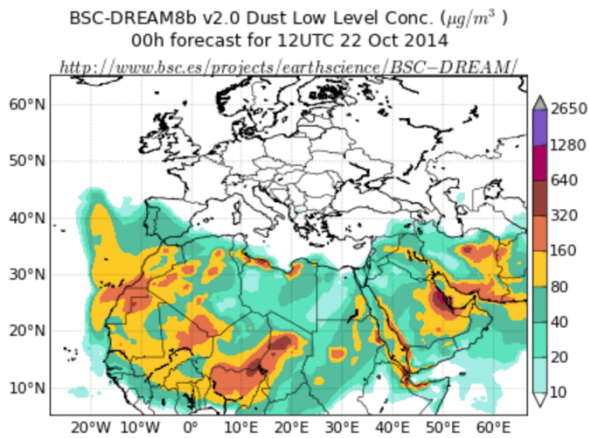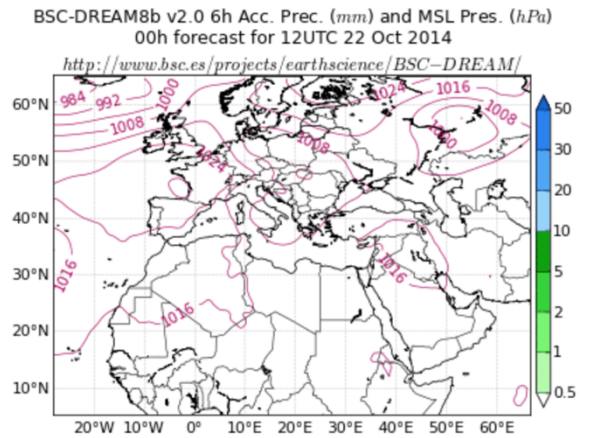

40  
41  
42  
43  
44  
45  
46  
47  
48  
49  
50  
51  
52  
53  
54

55 **Figure SM2 – Vertical distribution of dust at MM**

56 Examples of vertical distribution of dust transported at the MM site during two SH intrusions

57 (upper panels) and REG (lower lefthand panel) and NE (lower righthand panel) cases.

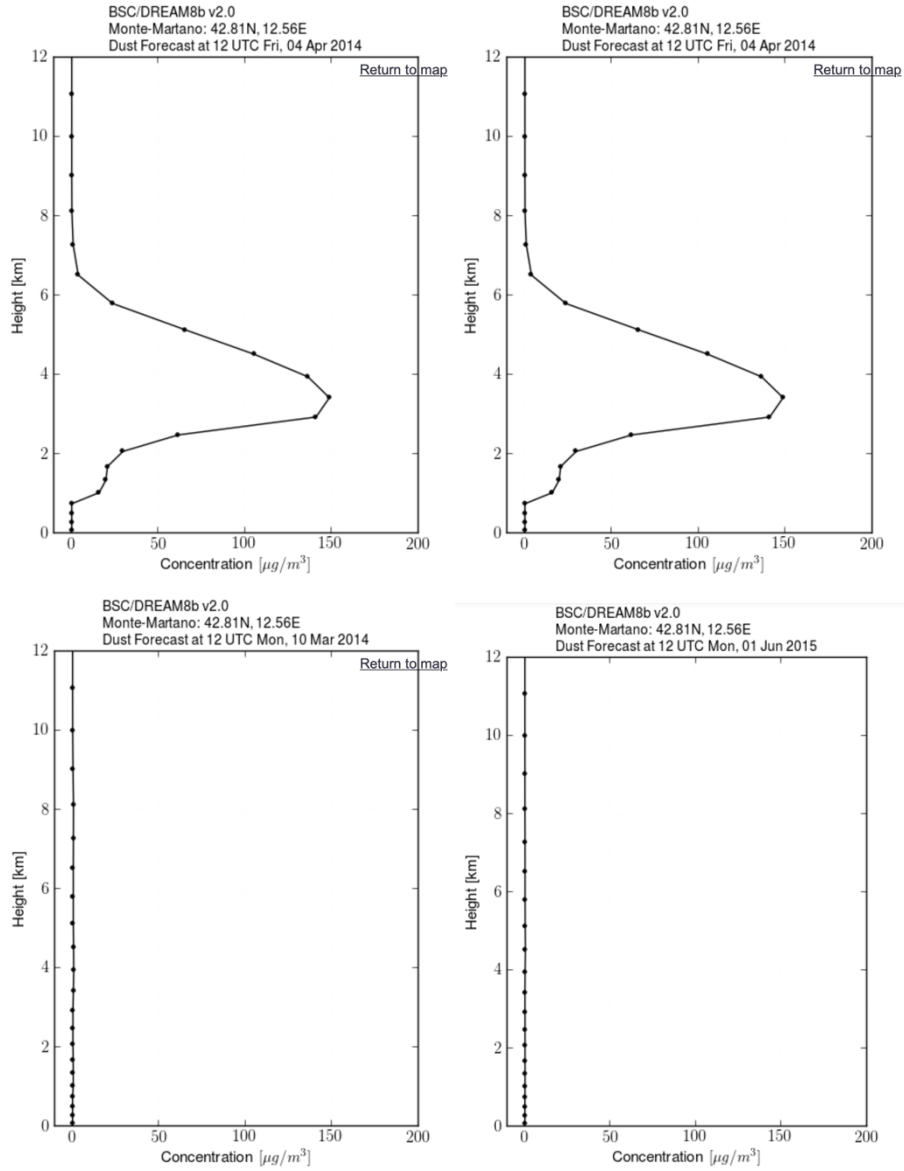

58

59

60 **Figure SM3 – Back Trajectory analysis for the 50m (upper panel) and 1000m (lower panel)**

61 **endpoints**

62

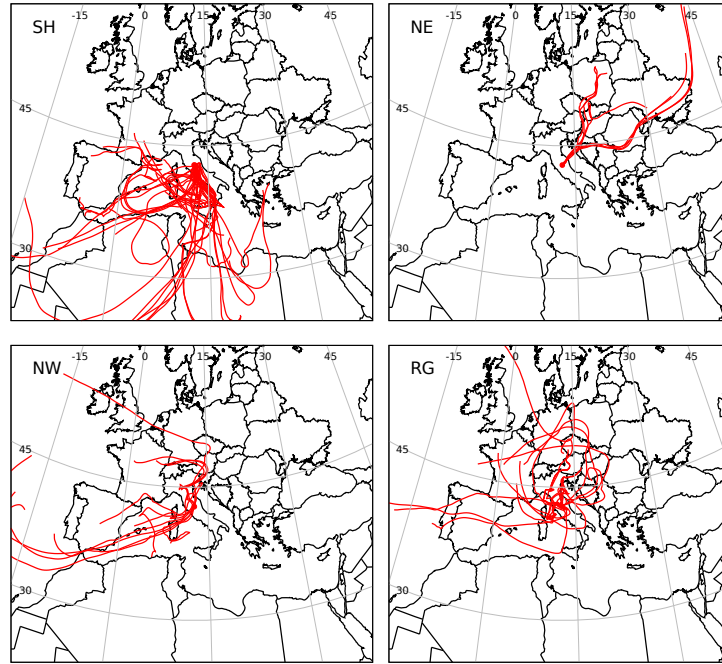

63

64

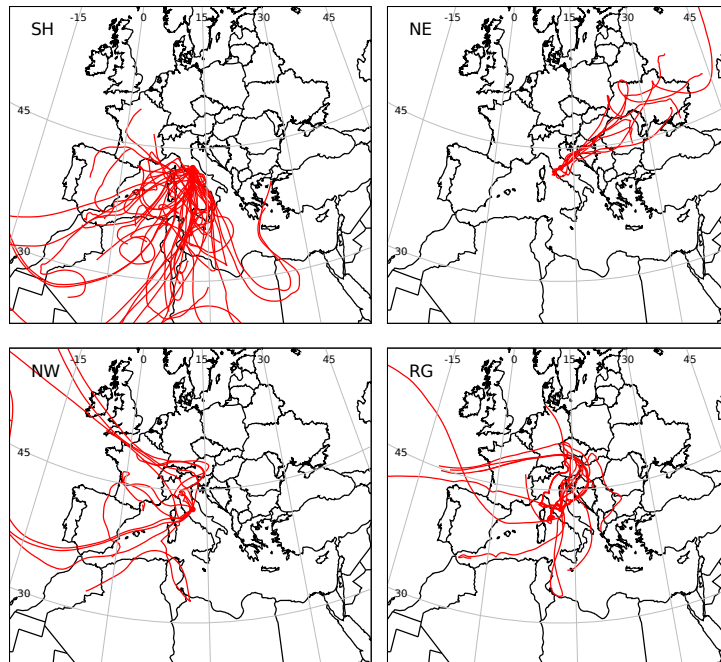

65

66

67 **Figure SM4 – PCA analysis on chemical variables determined for the various air samples.**

68 Principal Component analysis of the 19 cases (in blue) under study, exploiting chemical variables  
69 (in black) as determined in the present work. The first 2 PC are reported, which describe >50% of  
70 the total variance. See text for discussion.

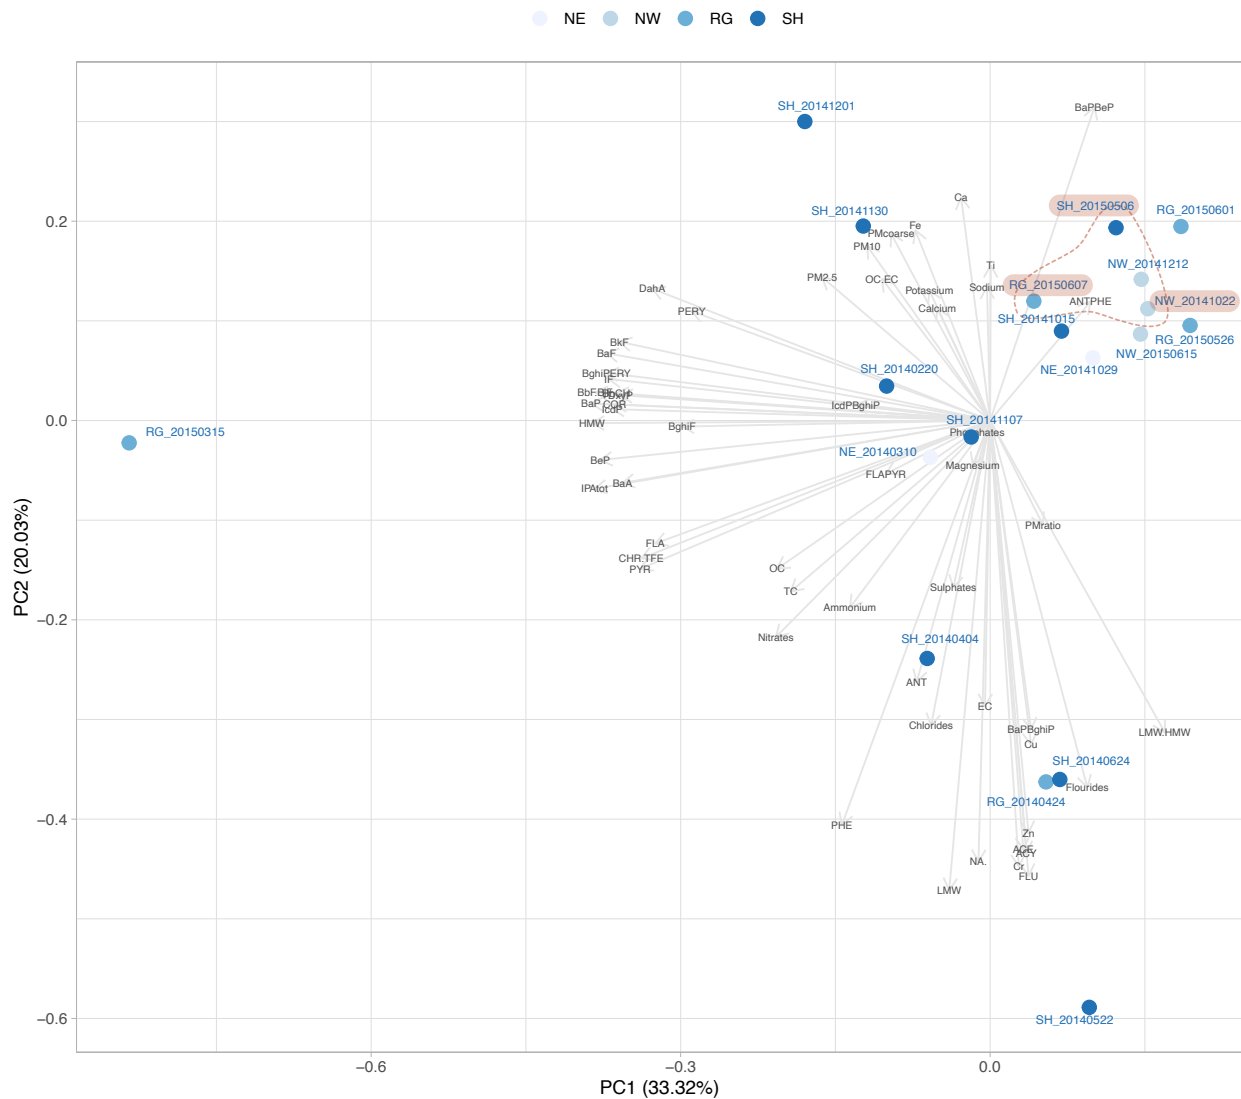

71

72 **Figure SM5 – Boxplot distribution of relative abundance of bacterial genera.**

73 The relative abundance of 116 genera, whose abundance was higher than 0.5%, are reported in  
74 a boxplot form for the various air mass origins (NE, NW, RG, SH) individuated in the present  
75 analysis.

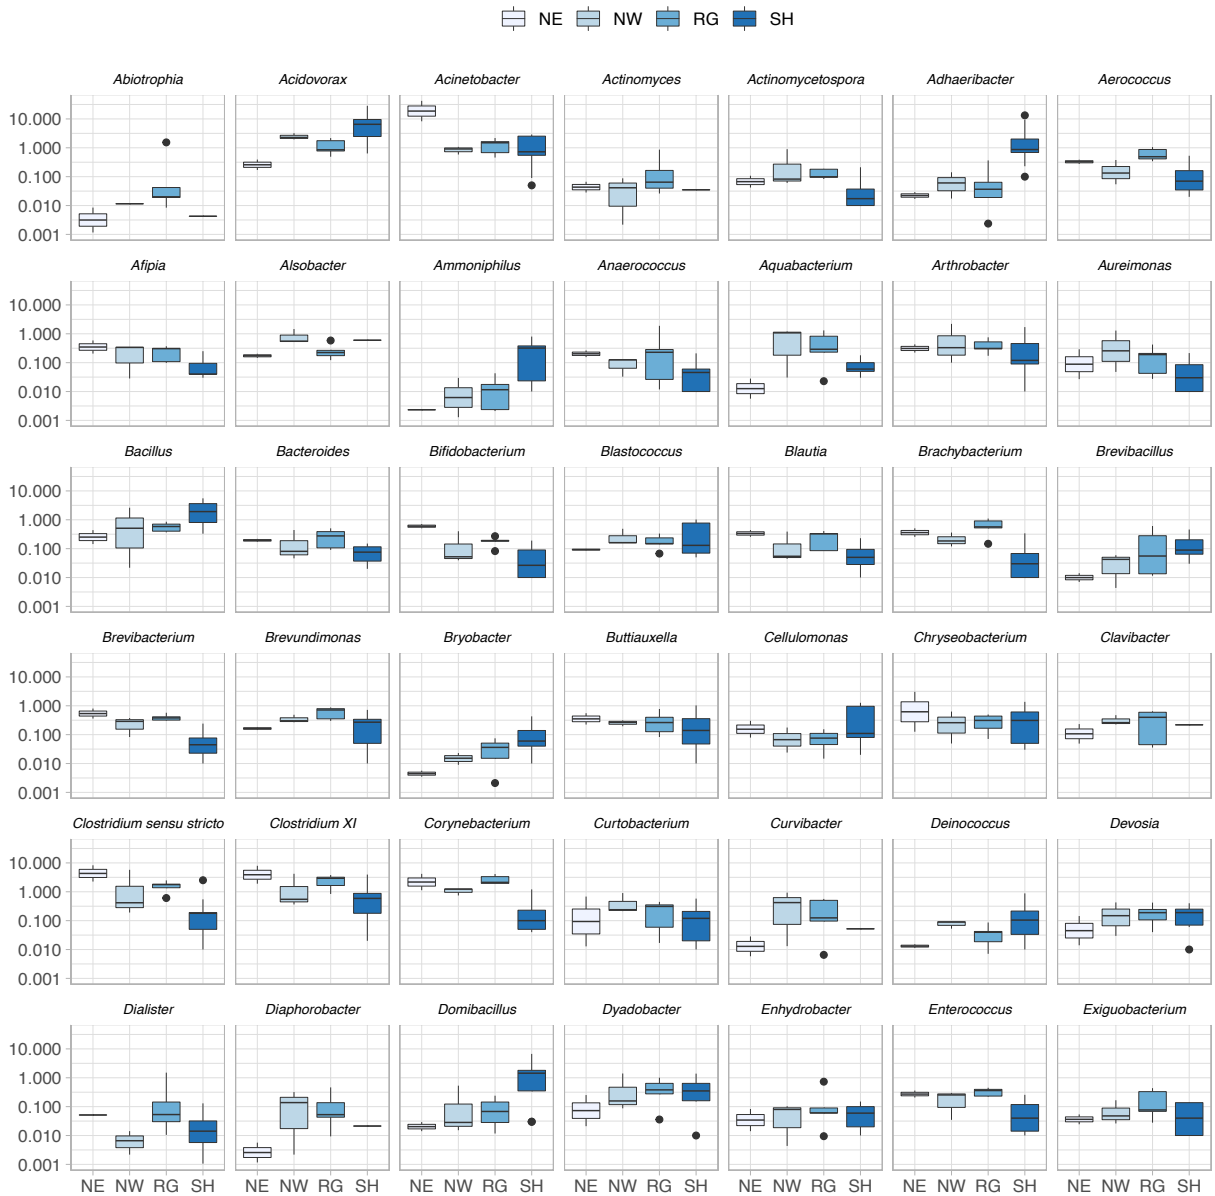

76

77 Cont.next page

78 Figure SM5 (continued)

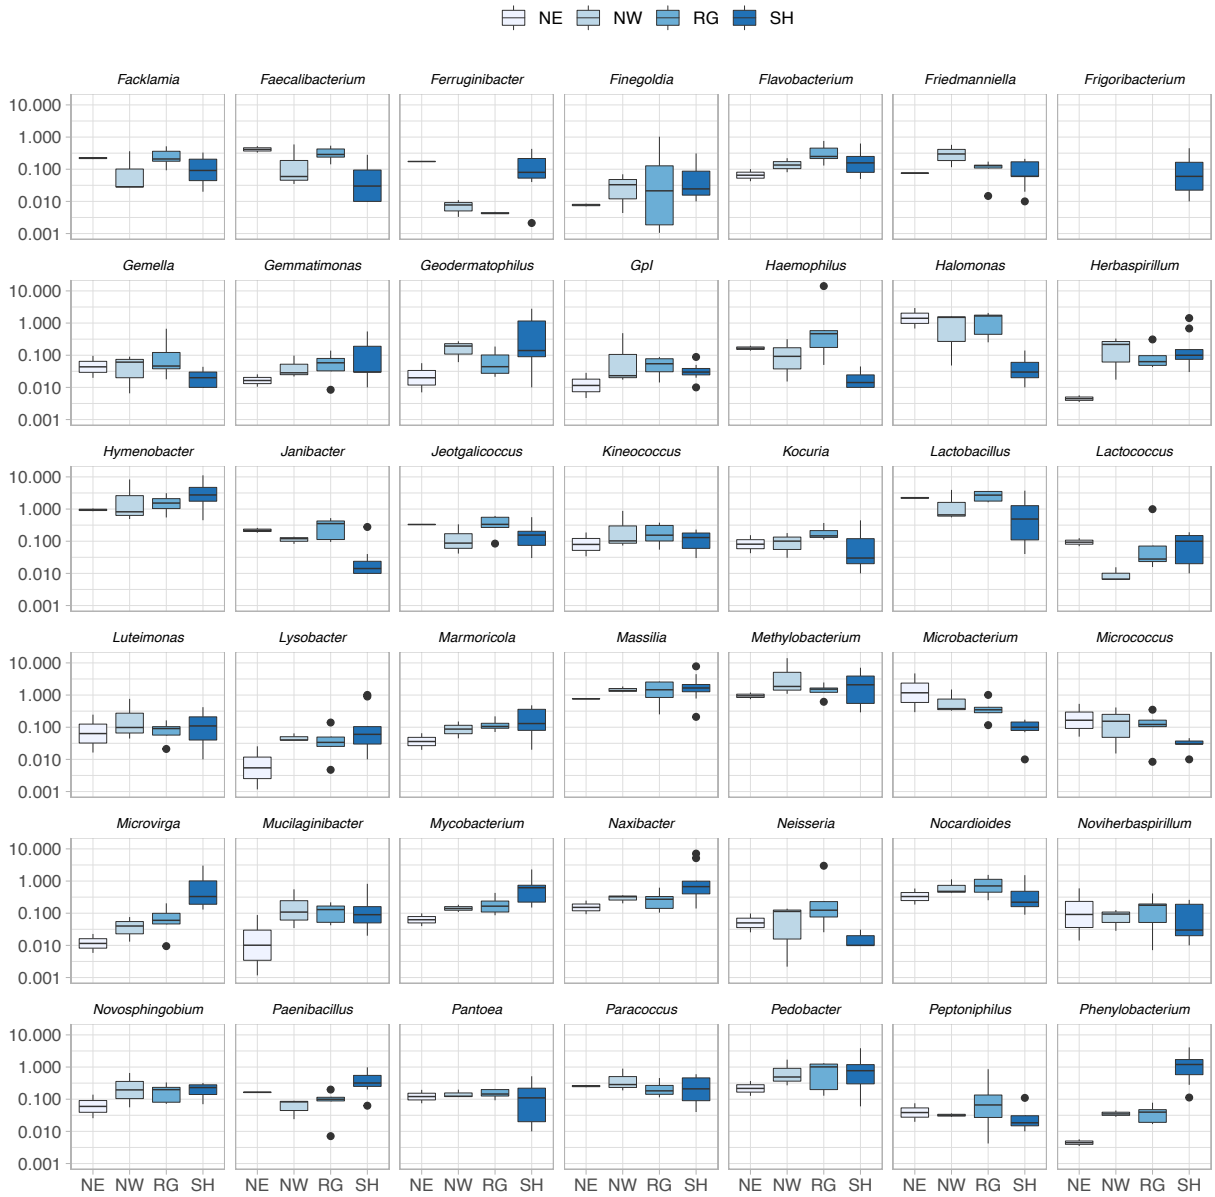

79

80

81 Cont.next page



82 Figure SM5 (continued)

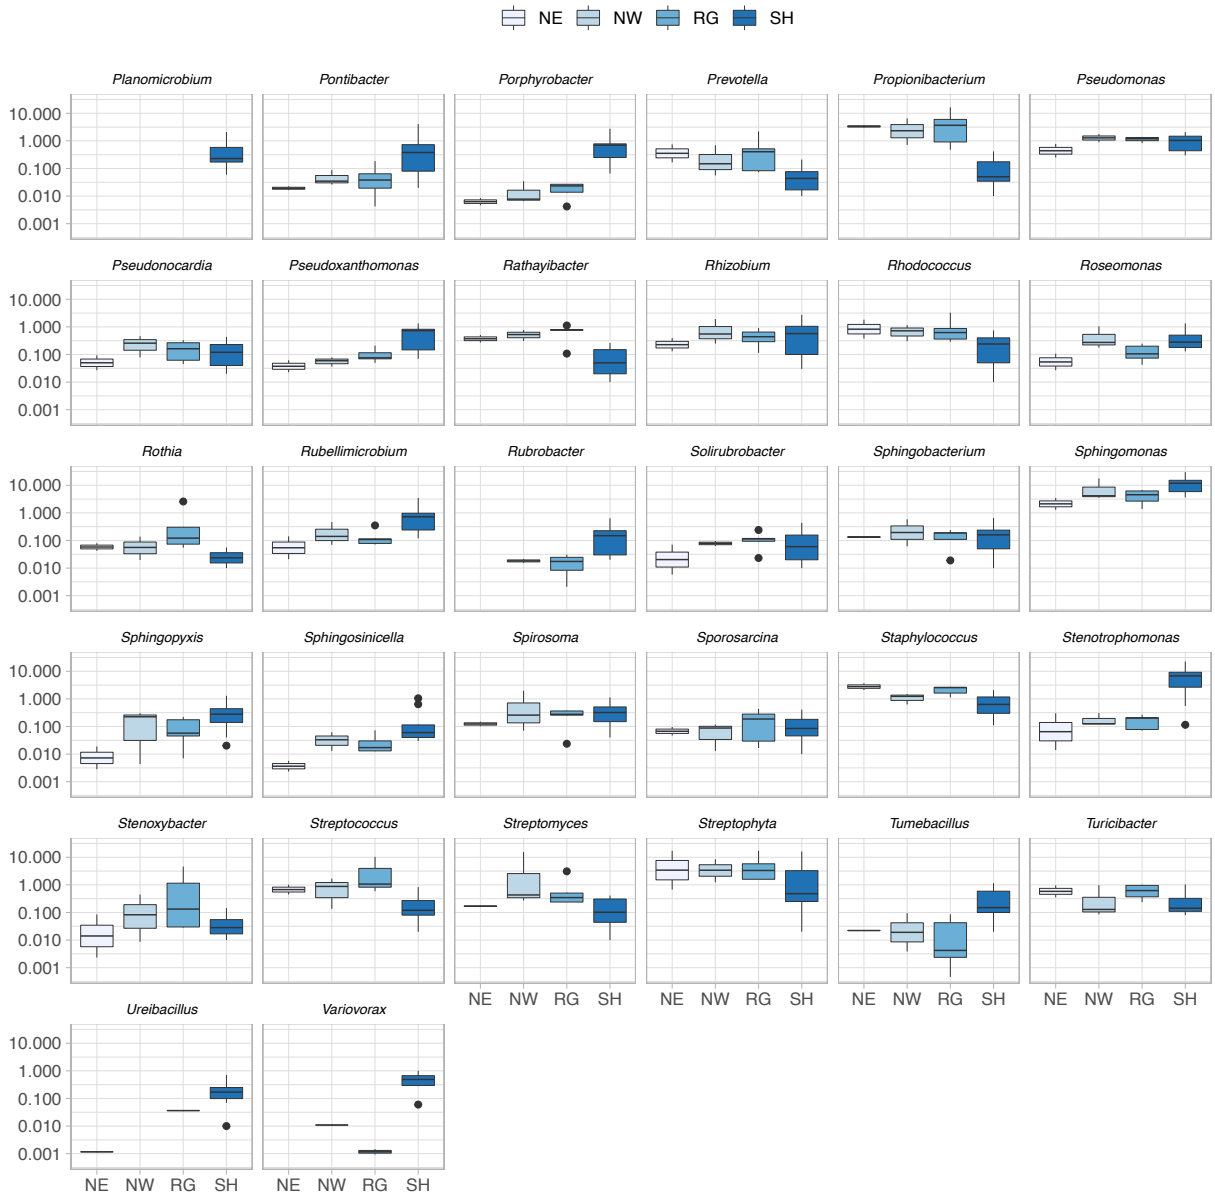

83

84

85
